# Supplementary material
Source: MDPI journal article supplement (https://www.mdpi.com/2227-9040/9/9/252)
Supplement: s1 [file s1]

# Additive Manufacturing as a Means of Gas Sensor Development for Battery Health Monitoring

Oleg Lupan <sup>1,2,3,\*</sup>, Helge Krüger <sup>1</sup>, Leonard Siebert <sup>1</sup>, Nicolai Ababii <sup>2,3</sup>, Niklas Kohlmann <sup>4</sup>, Artur Buzdugan <sup>3,5</sup>, Mani Teja Bodduluri <sup>6</sup>, Nicolae Magariu <sup>2,3</sup>, Maik-Ivo Terasa <sup>1</sup>, Thomas Strunskus <sup>7</sup>, Lorenz Kienle <sup>4</sup>, Rainer Adelung <sup>1,\*</sup> and Sandra Hansen <sup>1,\*</sup>

<sup>1</sup> Institute for Materials Science—Functional Nanomaterials, Faculty of Engineering, Kiel University, Kaiser Str. 2, 24143 Kiel, Germany; hkr@tf.uni-kiel.de (H.K.); lesi@tf.uni-kiel.de (L.S.); mate@tf.uni-kiel.de (M.-I.T.)

<sup>2</sup> Center for Nanotechnology and Nanosensors, Technical University of Moldova, 168 Stefan cel Mare Av., MD-2004 Chisinau, Moldova; nicolai.ababii@mib.utm.md (N.A.); nicolae.magariu@mib.utm.md (N.M.)

<sup>3</sup> Department of Microelectronics and Biomedical Engineering, Faculty of Computers, Informatics and Microelectronics, Technical University of Moldova, 168 Stefan cel Mare Av., MD-2004 Chisinau, Moldova; artur.buzdugan@mib.utm.md

<sup>4</sup> Synthesis and Real Structure, Institute for Materials Science, Kiel University, Kaiser Str. 2, 24143 Kiel, Germany; niko@tf.uni-kiel.de (N.K.); lk@tf.uni-kiel.de (L.K.)

<sup>5</sup> National Nuclear Security Support Centre, Technical University of Moldova, 168 Stefan cel Mare Av., MD-2004 Chisinau, Moldova

<sup>6</sup> Fraunhofer Institute for Silicon Technology (ISIT), Fraunhoferstrasse 1, 25524 Itzehoe, Germany; mtb@tf.uni-kiel.de

<sup>7</sup> Multicomponent Materials, Faculty of Engineering, Christian-Albrechts Universität zu Kiel, Kaiser Str. 2, 24143 Kiel, Germany; ts@tf.uni-kiel.de

\* Correspondence: ollu@tf.uni-kiel.de or oleg.lupan@mib.utm.md (O.L.); ra@tf.uni-kiel.de (R.A.); sn@tf.uni-kiel.de (S.H.)

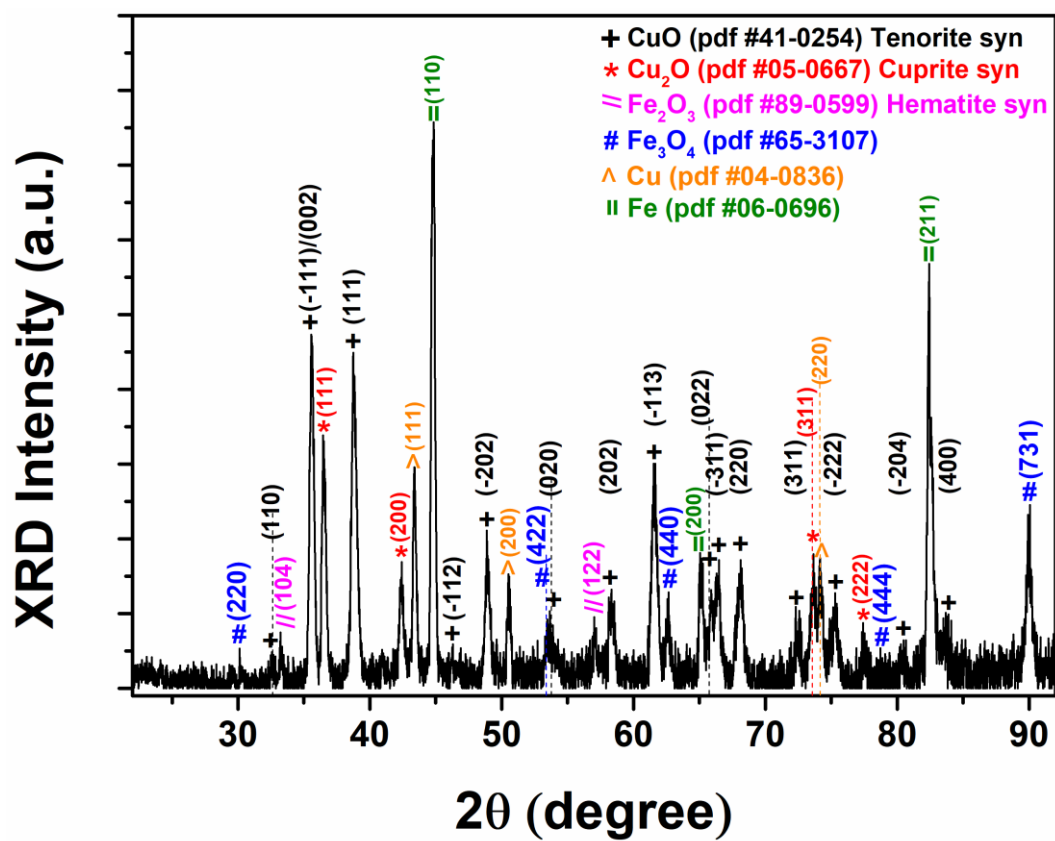

**Figure S1.** XRD diffractograms of the 3D printed copper and iron oxide heterostructure.

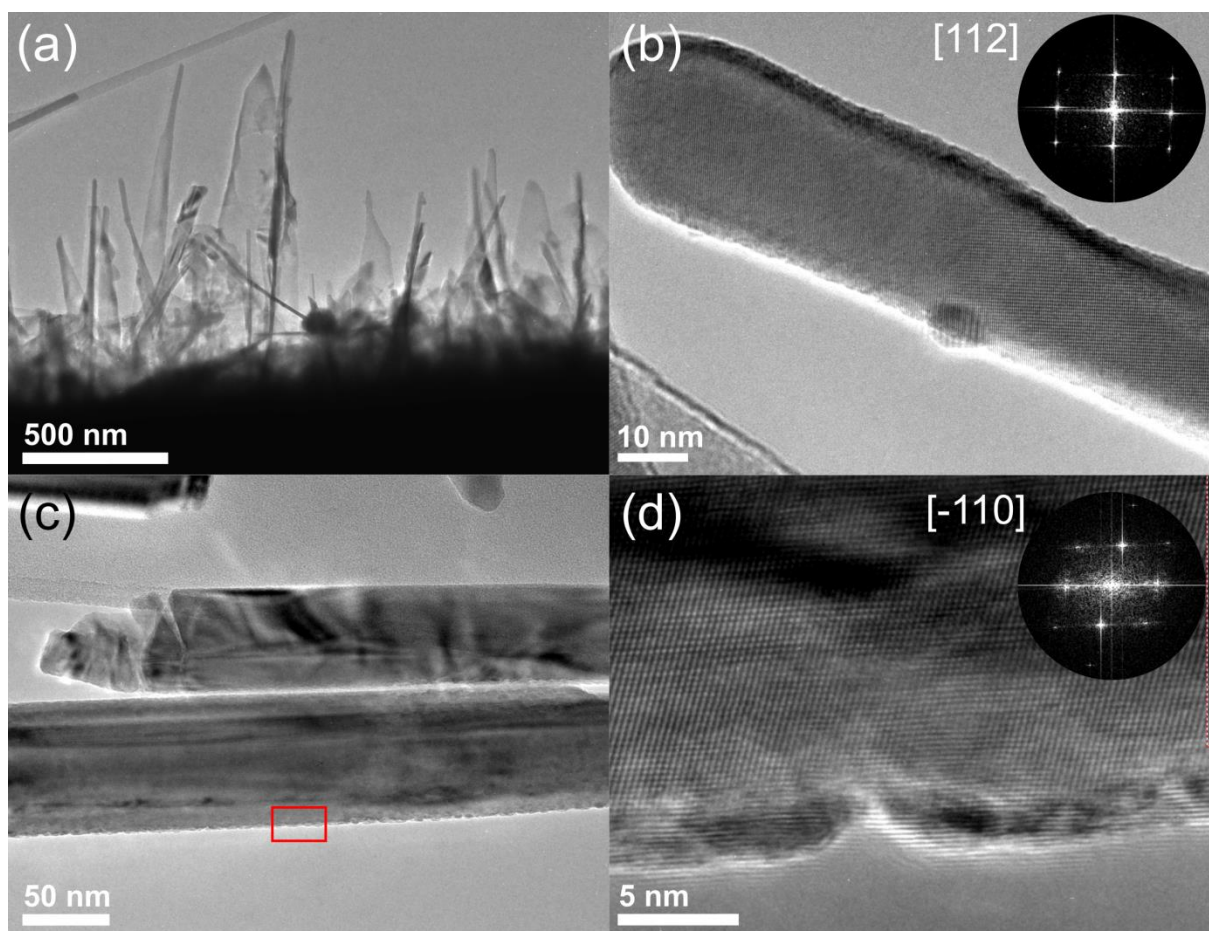

**Figure S2.** (a) TEM bright field micrograph of various iron oxide nanowires and nanospikes. (b) HRTEM micrograph of a single iron oxide nanowire with a diameter of 25nm. FFT (inset) shows that the wire is fully crystalline  $\text{Fe}_3\text{O}_4$  oriented in ZA [112]. (c) shows two CuO nanowires with diameters of 65 and 80 nm respectively. (d) HRTEM and subsequent FFT (inset) of the area marked in (c) show that the CuO nanowires possess monoclinic CuO crystal structure with the lower wire being oriented along ZA [-110].

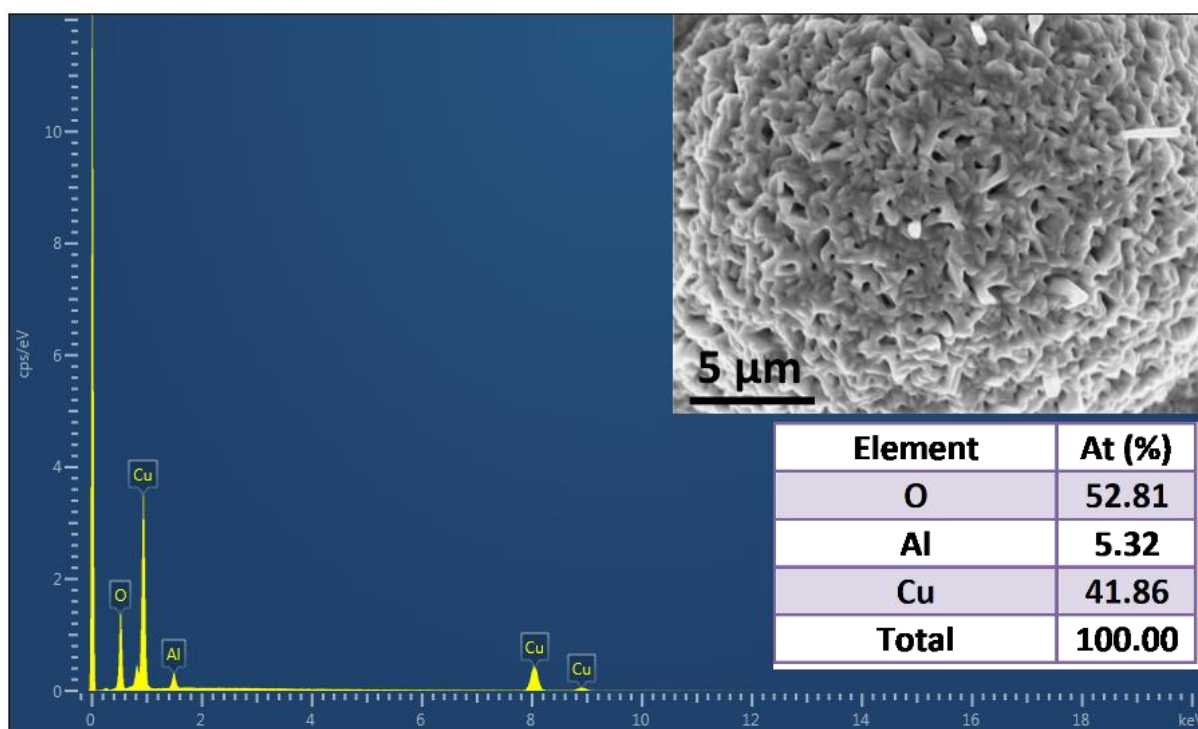

**Figure S3.** EDX spectrum with the elemental composition of the  $\text{Al}_2\text{O}_3/\text{CuO}$ -3D samples. Inset shows SEM image of the respective sample and region where spectrum was measured.

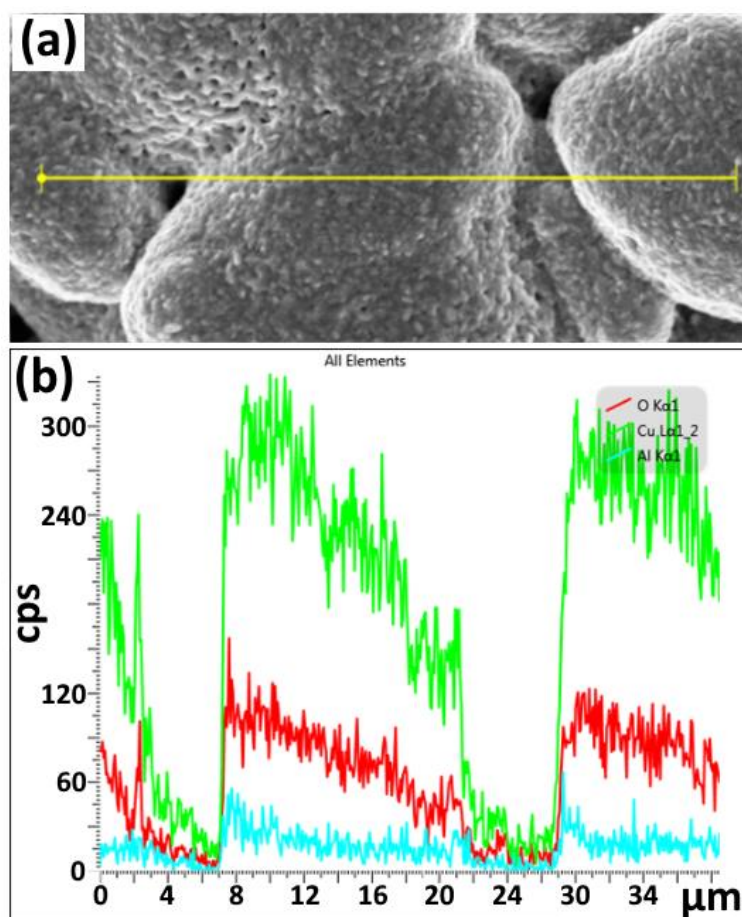

**Figure S4.** (a) SEM image and (b) EDX-line scan profile of Cu, O and Al taken along the three microparticles of CuO covered with a thin layer of  $\text{Al}_2\text{O}_3$ .
